# Supplementary material for: A CURE Lab in Introductory Biology at a Regional Comprehensive University Negatively Impacts Student Success in the Associated Lecture Course Among Students from Groups Underrepresented in Science
Source: Atypon-hosted journal article supplement (doi:10.1187/cbe.23-06-0122), 2024-05-21
Supplement: combinedsupmats.pdf [file combinedsupmats.pdf]

# Supplemental Material

*CBE—Life Sciences Education*

Casper and Laporte

## Supplemental Materials

### **A CURE Lab in Introductory Biology at a Regional Comprehensive University Negatively Impacts Student Success in the Associated Lecture Course Among Underrepresented Groups in Science**

Anne M. Casper, Marianne Laporte

|                                                                                                |             |
|------------------------------------------------------------------------------------------------|-------------|
| Representative example of traditional lab schedule for Introductory Biology: Cells & Molecules | Page 2      |
| Representative example of CURE schedule for Introductory Biology: Cells & Molecules            | Page 3      |
| Student demographics from both experiments                                                     | Page 4      |
| Post-course survey                                                                             | Pages 5 - 6 |
| Power analysis of effect sizes for student sub-groups                                          | Page 7      |
| Model selection for survey data analysis                                                       | Page 8      |
| Model selection for lecture exams data analysis                                                | Page 9      |
| Results from individual items on the Discovery/Relevance sub-scale of the LCAS                 | Page 10     |
| Results from individual items on the cognitive ownership sub-scale of the POS                  | Page 11     |
| Regression results, lecture exams using ln(odds of exam score) as outcome variable             | Page 12     |

**Representative example of traditional lab schedule for Introductory Biology: Cells & Molecules.** This lab meets once a week, for four hours. The first hour is for a recitation, and the remaining three hours are for a hands-on lab activity.

| Week | Date            | Recitation topic           | Lab Activity                                                                                              |
|------|-----------------|----------------------------|-----------------------------------------------------------------------------------------------------------|
| 1    | Sep 9 - 15      | Scientific method          | Scientific method – walking, running, and heart rate<br>Plant Fast Plants                                 |
| 2    | Sep 16 - 22     | (none)                     | Searching for primary literature<br>Plant oats and clovers                                                |
| 3    | Sep 23 - 29     | Macromolecules             | Osmosis and diffusion – dialysis bags                                                                     |
| 4    | Sep 30 – Oct 6  | Tips for success           | Enzymes – potato catalase                                                                                 |
| 5    | Oct 7 - 13      | Cellular respiration       | Photosynthesis – leaf punches and bicarbonate                                                             |
| 6    | Oct 14 - 20     | Cell division              | Mitosis and meiosis – pop beads                                                                           |
| 7    | Oct 21 - 27     | (none)                     | Lab Practical #1                                                                                          |
| 8    | Oct 28 – Nov 3  | DNA replication            | Molecular Biology part 1 – restriction enzyme digest of plasmids                                          |
| 9    | Nov 4 – Nov 10  | Transcription, Translation | Molecular Biology part 2 – gel electrophoresis of digested plasmids                                       |
| 10   | Nov 11 – Nov 17 | Mendelian genetics         | Mendelian genetics – phenotypes of crosses between Fast Plants                                            |
| 11   | Nov 18 – Nov 24 | No lab - Thanksgiving      | No lab - Thanksgiving                                                                                     |
| 12   | Nov 25 – Dec 1  | Natural selection          | Natural selection – bacteria on plates with and without antibiotics<br>Harvest oats and clover for drying |
| 13   | Dec 2 – Dec 8   | Organismal interactions    | Organismal interaction – evaluate growth of oats and clover potted in various combinations                |
| 14   | Dec 9 - 15      | (none)                     | Scientific Poster presentations of organismal interaction data                                            |
| 15   | Dec 16 - 22     |                            | Lab Practical #2                                                                                          |

**Representative example of CURE schedule for Introductory Biology: Cells & Molecules.** This lab meets twice a week, for two hours each time.

| Week | Date       | Discussion topic                                                                   | Lab Activity                                                                                                                    |
|------|------------|------------------------------------------------------------------------------------|---------------------------------------------------------------------------------------------------------------------------------|
| 1a   | Sep 9      | Antibiotic crisis, Lab safety, Soil                                                | Practice putting on/taking off PPE                                                                                              |
| 1b   | Sep 11     | Sterile technique, Growth media, Lab notebook                                      | Plate for bacterial colonies from instructor-provided soil sample                                                               |
| 2a   | Sep 16     | Serial dilution                                                                    | Learn micropipetting and serial dilution                                                                                        |
| 2b   | Sep 18     | More serial dilution                                                               | Plate for colonies from student-provided soil sample<br>Determine soil type (clay, sand, silt)                                  |
| 3a   | Sep 23     | Metabolic pathways, Auxotrophs                                                     | View plates from student soil<br>Repeat best dilution for screening experiment                                                  |
| 3b   | Sep 25     | Intro to scientific literature<br>Structure of Introductions in primary literature | Count CFU/g on control plate<br>Make Art Palette plate                                                                          |
| 4a   | Sep 30     | Microscopes                                                                        | Practice using a microscope (prepared slides and pond water)                                                                    |
| 4b   | Oct 2      | Gram staining, Peptidoglycan                                                       | Gram staining with control bacteria                                                                                             |
| 5a   | Oct 7      | Structure of Mat & Meth in primary literature                                      | Identify antibiotic-producing microbes<br>Streak to purify antibiotic-producing microbes                                        |
| 5b   | Oct 9      | (none)                                                                             | Gram stain antibiotic-producing microbes<br>Repeat streaks to purify microbes as needed                                         |
| 6a   | Oct 14     | Penicillin, ESKAPE pathogens                                                       | Screen antibiotic-producing microbes against panel of ESKAPE relatives                                                          |
| 6b   | Oct 16     | (none)                                                                             | Use microscopes to view Gram stains<br>Repeat Gram staining as needed<br>Create Agar art                                        |
| 7a   | Oct 21     | Structure of Results section in primary literature                                 | View plates of screen against ESKAPE relatives<br>Re-streak microbes that kill ESKAPE relatives                                 |
| 7b   | Oct 23     | Jeopardy! (for review)                                                             | Agar Art competition                                                                                                            |
| 8a   | Oct 28     | Lab Practical #1                                                                   | Lab Practical #1                                                                                                                |
| 8b   | Oct 30     | Sterilization by autoclave<br>Tour CMBB lab                                        | Make media<br>Re-streak to further purify antibiotic-producing microbes                                                         |
| 9a   | Nov 4      | Structure of Discussion in primary literature<br>Finding primary lit               | Re-streak to further purify                                                                                                     |
| 9b   | Nov 6      | Intro to the TE database<br>PCR                                                    | Enter info in online TE database<br>Make frozen stocks of antibiotic-producing microbes<br>PCR on antibiotic-producing microbes |
| 10a  | Nov 11     | Abstracts and Titles in primary literature<br>Gel electrophoresis                  | Gel electrophoresis<br>Repeat PCR as needed                                                                                     |
| 10b  | Nov 13     | ExoSap                                                                             | Repeat gel electrophoresis as needed<br>ExoSAP treatment of successful PCR samples                                              |
| 11a  | Nov 18     | Sanger sequencing                                                                  | Prepare ExoSAP-treated samples for Sanger sequencing                                                                            |
| 11b  | Nov 20     | Peer reviewing process                                                             | In-class peer review of two other lab reports                                                                                   |
| 12a  | Nov 25     | Analyzing chromatograms, BLAST                                                     | BLAST analysis of sequencing results<br>In-class literature search to find articles related to BLAST results                    |
| 12b  | Nov 27     | No class - Thanksgiving                                                            | No class - Thanksgiving                                                                                                         |
| 13a  | Dec 2      | What is a scientific poster                                                        | Add more info to online TE database<br>In-class work time to create individual poster                                           |
| 13b  | Dec 4      | How to present a scientific poster                                                 | In-class work time to create group poster<br>Peer-review of another table's individual posters,                                 |
| 14a  | Dec 9      | (none)                                                                             | In-class work time to create group poster                                                                                       |
| 14b  | Dec 11     | Jeopardy! (for review)                                                             | Group poster presentation                                                                                                       |
| 15a  | Final Exam | Lab Practical #2                                                                   | Lab Practical #2                                                                                                                |

Student demographics are similar in the traditional lab (Trad) and CURE in both experiments.

|                                                                        | Experiment #1<br>(Volunteer CURE) <sup>b</sup>       | Experiment #2<br>(Non-volunteer CURE)                                                                                                                                               |
|------------------------------------------------------------------------|------------------------------------------------------|-------------------------------------------------------------------------------------------------------------------------------------------------------------------------------------|
| Semesters of survey data and lecture exam data collection <sup>a</sup> | Fall 2018<br>Winter 2019<br>Fall 2019<br>Winter 2020 | Fall 2016 (traditional only) <sup>c</sup><br>Winter 2017 (traditional only) <sup>c</sup><br>Fall 2017 (traditional only)<br>Winter 2018 (traditional only)<br>Fall 2021 (CURE only) |

|                                                                       |                                                          |                                                                            |
|-----------------------------------------------------------------------|----------------------------------------------------------|----------------------------------------------------------------------------|
|                                                                       |                                                          | Winter 2022 (CURE only) <sup>d</sup><br>Fall 2022 (CURE only) <sup>d</sup> |
| <b>Total Enrollment</b>                                               | Trad n=684<br>CURE n=239                                 | Trad n=1091<br>CURE n=619                                                  |
| <b>Median concurrent GPA (1<sup>st</sup>-3<sup>rd</sup> quartile)</b> | Trad 3.220 (2.333 – 3.737)<br>CURE 3.291 (2.338 – 3.795) | Trad 3.100 (2.300 – 3.700)<br>CURE 3.190 (2.300 – 3.809)                   |
| <b>Female (% of total enrollment)</b>                                 | Trad n=453 (66%)<br>CURE n=167 (70%)                     | Trad n=724 (66%)<br>CURE n=434 (70%)                                       |
| <b>BIPOC (% of total enrollment)</b>                                  | Trad n=208 (30%)<br>CURE n=76 (32%)                      | Trad n=323 (30%)<br>CURE n=218 (35%)                                       |
| <b>Pell Eligible (% of total enrollment)</b>                          | Trad n=311 (45%)<br>CURE n=115 (48%)                     | Trad n=487 (45%)<br>CURE n=257 (42%)                                       |
| <b>First Generation (% of total enrollment)</b>                       | Trad n=182 (27%)<br>CURE n=62 (26%)                      | Trad n=295 (27%)<br>CURE n=139 (22%)                                       |

<sup>a</sup> No data was collected during academic year 2020 – 2021 due to the impact of the COVID pandemic.

<sup>b</sup> Multiple sections of the CURE and the traditional lab were offered every semester of Experiment 1

<sup>c</sup> Lecture exam data was not collected from Fall 2016 or Winter 2017.

<sup>d</sup> Survey data was not collected from Winter 2022 2016 or Fall 2022.

**Post-course survey.** This survey consisted of all items from the Laboratory Course Assessment Survey (LCAS) and all items from the Project Ownership Survey (POS).

| Survey instrument                          | Sub-scale     | Questions                                                                             | Likert Scale Response options               |
|--------------------------------------------|---------------|---------------------------------------------------------------------------------------|---------------------------------------------|
| Laboratory Course Assessment Survey (LCAS) | Collaboration | In this course...<br><br>I was encouraged to discuss element of my investigation with | Never; One or two times;<br>Monthly; Weekly |

|                                                         |                     |                                                                                                                                                                                                                                                                                                                                                                                                                                                                                                                                                                                                           |                                                                                       |
|---------------------------------------------------------|---------------------|-----------------------------------------------------------------------------------------------------------------------------------------------------------------------------------------------------------------------------------------------------------------------------------------------------------------------------------------------------------------------------------------------------------------------------------------------------------------------------------------------------------------------------------------------------------------------------------------------------------|---------------------------------------------------------------------------------------|
| (Corwin et al. 2015)                                    |                     | <p>classmates of instructors</p> <p>I was encouraged to reflect on what I was learning</p> <p>I was encouraged to contribute my ideas and suggestions during class discussions</p> <p>I was encouraged to help other students collect or analyze data</p> <p>I was encouraged to provide constructive criticism to classmates and challenge each other's interpretations</p> <p>I was encouraged to share the problems I encountered during my investigation and seek input on how to address them</p>                                                                                                    |                                                                                       |
|                                                         | Iteration           | <p>In this course....</p> <p>I was expected to revise or repeat work to account for errors or fix problems</p> <p>I had time to change the methods of the investigation if it was not unfolding as predicted</p> <p>I had time to share and compare data with other students</p> <p>I had time to collect and analyze additional data to address new questions or further test hypotheses that arose during the investigation</p> <p>I had time to revise or repeat analyses based on feedback</p> <p>I had time to revise drafts of papers or presentations about my investigation based on feedback</p> | Strongly disagree; Disagree; Somewhat disagree; Somewhat agree; Agree; Strongly agree |
|                                                         | Discovery/Relevance | <p>In this course....</p> <p>I was expected to generate novel results that are unknown to the instructor and that could be of interest to the broader scientific community or others outside of class</p> <p>I was expected to conduct an investigation to find something previously unknown to myself, other students, and the instructor</p> <p>I was expected to formulate my own research questions or hypotheses to guide an investigation</p> <p>I was expected to develop new arguments based on data</p> <p>I was expected to explain how my work has resulted in new scientific knowledge</p>    | Strongly disagree; Disagree; Somewhat disagree; Somewhat agree; Agree; Strongly agree |
| Project Ownership Survey (POS) (Hanauer and Dolan 2014) | Cognitive Ownership | <p>My research will help to solve a problem in the world.</p> <p>My findings were important to the scientific community.</p> <p>I faced challenges that I managed to overcome in completing my research project.</p> <p>I was responsible for the outcomes of my research.</p> <p>The findings of my research project gave me a sense of personal achievement.</p> <p>I had a personal reason for choosing the research project I worked on.</p> <p>The research question I worked on was important to me.</p> <p>In conducting my research project, I actively sought advice and</p>                     | Strongly disagree; Disagree; Neither disagree nor agree; Agree; Strongly agree        |

|  |                     |                                                                                                                                                                                                                                                                                                                                                                                                                                                                                                                                                                                                                                                 |                                                                |
|--|---------------------|-------------------------------------------------------------------------------------------------------------------------------------------------------------------------------------------------------------------------------------------------------------------------------------------------------------------------------------------------------------------------------------------------------------------------------------------------------------------------------------------------------------------------------------------------------------------------------------------------------------------------------------------------|----------------------------------------------------------------|
|  |                     | assistance.<br>My research project was interesting.<br>My research project was exciting.                                                                                                                                                                                                                                                                                                                                                                                                                                                                                                                                                        |                                                                |
|  | Emotional Ownership | <sup>a</sup> To what extent does the word delighted describe your experience of the laboratory course?<br><sup>a</sup> To what extent does the word happy describe your experience of the laboratory course?<br><sup>a</sup> To what extent does the word joyful describe your experience of the laboratory course?<br><sup>b</sup> To what extent does the word astonished describe your experience of the laboratory course?<br><sup>b</sup> To what extent does the word surprised describe your experience of the laboratory course?<br><sup>b</sup> To what extent does the word amazed describe your experience of the laboratory course? | Very slightly; Slightly; Moderate; Considerably; Very strongly |

<sup>a</sup> If the Project Ownership Survey items load onto three factors as suggested in (Corwin et al. 2018), these items load on the “Enjoyment” sub-scale.

<sup>b</sup> If the Project Ownership Survey items load onto three factors as suggested in (Corwin et al. 2018), these items load on the “Surprise” sub-scale.

**Power analysis of data sets from Experiment #1 (recruitment bias present) and Experiment #2 (no recruitment bias) indicates that most of the effect sizes for student sub-groups are of medium magnitude.** Cohen’s d (effect size) is shown by student subgroup for each experiment for the latent constructs of Collaboration, Iteration, and Discovery/Relevance on the Laboratory Course Assessment Survey (LCAS), the latent constructs of enjoyment and surprise on the Project Ownership Survey (POS), and for Lecture Exam score. Effect sizes that have a medium or large magnitude are shown in bold green font. All other effect sizes are small. Classification of the magnitude of effect size follows the classification for educational interventions proposed by Kraft (2020): less than 0.05 is small, 0.05 to less than 0.20 is medium, and 0.20 and above is large.

| Student sub-group | Collaboration | Iteration | Discovery/Relevance | Enjoyment | Surprise | Lecture Exam Score |
|-------------------|---------------|-----------|---------------------|-----------|----------|--------------------|
|-------------------|---------------|-----------|---------------------|-----------|----------|--------------------|

|                                     |      |      |      |      |      |      |
|-------------------------------------|------|------|------|------|------|------|
| Exp 1, Pell eligible only           | 0.13 | 0.08 | 0.00 | 0.06 | 0.09 | 0.03 |
| Exp 1, BIPOC only                   | 0.07 | 0.07 | 0.11 | 0.18 | 0.19 | 0.08 |
| Exp 1, Both Pell eligible and BIPOC | 0.04 | 0.02 | 0.02 | 0.05 | 0.07 | 0.28 |
| Exp 2, Pell eligible only           | 0.02 | 0.15 | 0.01 | 0.03 | 0.03 | 0.04 |
| Exp 2, BIPOC only                   | 0.03 | 0.08 | 0.03 | 0.01 | 0.01 | 0.12 |
| Exp 2, Both Pell eligible and BIPOC | 0.13 | 0.00 | 0.05 | 0.07 | 0.06 | 0.24 |

### Regression Model Selection for Survey Data Analysis

Model selection was carried out as recommended for discipline-based education research (E. Theobald, 2018). Since students are nested in lab sections, and lab sections are nested in semesters, we evaluated whether these would be appropriate to include as random effects in a multilevel regression model. We first calculated the intraclass correlation (ICC) for lab section and semester in both Experiment #1 and Experiment #2 for each student perception of each subscale on the LCAS (collaboration, iteration, or discovery/relevance) or the POS (enjoyment or surprise). All ICC values were <0.001.

| Random Effect     | ICC for collaboration | ICC for iteration | ICC for discovery relevance | ICC for enjoyment | ICC for surprise |
|-------------------|-----------------------|-------------------|-----------------------------|-------------------|------------------|
| Exp1: Lab Section | <0.001                | <0.001            | <0.001                      | <0.001            | <0.001           |



|                   |        |        |        |        |        |
|-------------------|--------|--------|--------|--------|--------|
| Exp1: Semester    | <0.001 | <0.001 | <0.001 | <0.001 | <0.001 |
| Exp2: Lab Section | <0.001 | <0.001 | <0.001 | <0.001 | <0.001 |
| Exp2: Semester    | <0.001 | <0.001 | <0.001 | <0.001 | <0.001 |

The fixed effects that we tested included Lab Type (Traditional or CURE), student subgroup (Pell only, BIPOC only, Both, or Neither), and Sex (male or female). We built a fixed effects-only model that tests the hypothesis that lab type affects student perceptions, and that student subgroups are differentially affected by lab type (Model 1). We then fit additional models with all the possible combinations of random effects (Models 2 – 4):

- Model 1: Student perception ~ Lab Type \* Subgroup + Sex
- Model 2: Student perception ~ Lab type \* Subgroup + Sex + (1|Lab Section)
- Model 3: Student perception ~ Lab type \* Subgroup + Sex + (1|Semester)
- Model 4: Student perception ~ Lab type \* Subgroup + Sex + (1|Lab Section) + (1|Semester)

Comparing Models 1 – 4, Model 1 has the lowest AIC in all cases. Therefore, neither lab section nor semester was retained as a random effect. This is consistent with the low ICC values for these effects. We then tested an additional model, removing the fixed effect of sex since this is not explicitly part of the hypothesis we are testing.

Model 5: Student perception ~ Lab Type \* Subgroup

The AIC value is reported below for each model. The lowest AIC value (that is, the best-fitting model) is shown in blue bold font; any models within  $\Delta AIC = 2$  of the lowest AIC value are shown in black bold.

| Model | Collaboration Exp 1 AIC | Collaboration Exp2 AIC | Iteration Exp 1 AIC | Iteration Exp2 AIC | Discovery Relevance Exp 1 AIC | Discovery Relevance Exp2 AIC | Enjoyment Exp 1 AIC | Enjoyment Exp2 AIC | Surprise Exp 1 AIC | Surprise Exp2 AIC |
|-------|-------------------------|------------------------|---------------------|--------------------|-------------------------------|------------------------------|---------------------|--------------------|--------------------|-------------------|
| Mod1  | <b>322.9</b>            | <b>234.7</b>           | <b>410.9</b>        | <b>341.1</b>       | <b>421.8</b>                  | <b>370.2</b>                 | <b>371.7</b>        | 333.5              | <b>378.8</b>       | <b>320.0</b>      |
| Mod2  | 332.0                   | 241.4                  | 417.4               | 345.5              | 426.1                         | 372.9                        | 381.0               | 339.8              | 388.1              | 327.4             |
| Mod3  | 336.4                   | 249.1                  | 417.7               | 346.8              | 427.3                         | 372.9                        | 381.6               | 339.8              | 388.1              | 327.3             |
| Mod4  | 334.0                   | 243.4                  | 419.4               | 347.5              | 427.8                         | 374.5                        | 383.0               | 341.8              | 390.1              | 329.3             |
| Mod5  | <b>321.6</b>            | <b>236.2</b>           | <b>410.8</b>        | <b>339.3</b>       | <b>421.0</b>                  | <b>369.1</b>                 | 374.6               | <b>332.1</b>       | <b>377.2</b>       | <b>318.1</b>      |

In both Experiment #1 and #2, Model 5 is the best fit in nearly all cases because it has the lowest AIC and is the simplest model. For consistency we have chosen to use Model 5 for all survey data for both experiments.

### Regression Model Selection for Lecture Exams Data Analysis

The proportion of lecture exam points earned from the total possible was calculated for each student. To avoid having the exam score dependent variable trapped between 0 and 1, we took the natural log of the odds of exam score. The  $\ln(\text{odds of exam score})$  was used as the outcome variable in linear regression. Model selection was carried out as recommended for discipline-based education research (E. Theobald, 2018). We evaluated whether lab section, semester, lecture instructor, or lecture instructor by semester (since lecture instructors taught in multiple semesters) would be appropriate to include as random effects in a multilevel regression model. We calculated the intraclass correlation (ICC) for each random effect in both Experiment #1 and Experiment #2.

| Random Effect | ICC for Exams, Experiment #1 | ICC for Exams, Experiment #2 |
|---------------|------------------------------|------------------------------|
| Lab Section   | 0.032                        | 0.025                        |

|                                |        |       |
|--------------------------------|--------|-------|
| Semester                       | 0.002  | 0.046 |
| Lecture Instructor by Semester | <0.001 | 0.089 |

The fixed effects that we tested included Lab Type (Traditional or CURE), student subgroup (Pell only, BIPOC only, Both, or Neither), sex (male or female), and concurrent GPA. To reduce negative skew in the concurrent GPA, we reflected each value by subtracting from five, and then took the natural log of the reflected value. We built a fixed effects-only model that tests the hypothesis that lab type affects lecture exam score, and that student subgroups are differentially affected by lab type (Model 1). We then fit additional models with all the possible combinations of random effects (Models 2 – 8).

|                                                                                                                 | Exp 1 AIC  | Exp 2 AIC  |
|-----------------------------------------------------------------------------------------------------------------|------------|------------|
| Model 1: exams ~ Lab Type * Subgroup + Sex + GPA                                                                | <b>939</b> | <b>852</b> |
| Model 2: exams ~ Lab Type * Subgroup + Sex + GPA + (1 Lab Section)                                              | 967        | 877        |
| Model 3: exams ~ Lab Type * Subgroup + Sex + GPA + (1 Semester)                                                 | 968        | 873        |
| Model 4: exams ~ Lab Type * Subgroup + Sex + GPA + (1 Lec Instruc by Semester)                                  | 968        | 862        |
| Model 5: exams ~ Lab Type * Subgroup + Sex + GPA + (1 Lab Section) + (1 Semester)                               | 969        | 871        |
| Model 6: exams ~ Lab Type * Subgroup + Sex + GPA + (1 Lab Section) + (1 Lec Instruc by Semester)                | 969        | 860        |
| Model 7: exams ~ Lab Type * Subgroup + Sex + GPA + (1 Semester) + (1 Lec Instruc by Semester)                   | 970        | 864        |
| Model 8: exams ~ Lab Type * Subgroup + Sex + GPA + (1 Lab Section) + (1 Semester) + (1 Lec Instruc by Semester) | 971        | 862        |

For both Experiments #1 and #2, Model 1 has the lowest AIC. Therefore no random effects were retained in the best-fitted model for Experiment #1 or #2, which is consistent with the low ICC values for these effects. Next, we fit additional models using the process of backwards model selection, removing one fixed effect at a time in order, starting with the fixed effect that has the smallest effect. If AIC increased upon removal, we retained that effect. These models and the AIC values for Experiments #1 and #2 are listed below.

|                                                  | Exp 1 AIC  | Exp 2 AIC  |
|--------------------------------------------------|------------|------------|
| Model 1: exams ~ Lab Type * Subgroup + Sex + GPA | <b>939</b> | <b>852</b> |
| Model 9: exams ~ Lab Type * Subgroup + GPA       | <b>940</b> | 857        |
| Model 10: exams ~ Lab Type + Sex + GPA           | 1052       | 919        |
| Model 11: exams ~ Lab Type * Subgroup + Sex      | 1177       | 1053       |

For Experiment #2, Model 1 is the best fit because it has the lowest AIC. For Experiment #1, Model 1 and Model 9 have AIC values with equivalent fit. For consistency we have chosen to use Model 1 for both experiments.

### Results from individual items on the Discovery/Relevance sub-scale of the LCAS

Horizontal bars indicate median and boxes represent the interquartile range for each item. The items included on this subscale are: In this course....

(DR1) I was expected to generate novel results that are unknown to the instructor and that could be of interest to the broader scientific community or others outside of class

(DR2) I was expected to conduct an investigation to find something previously unknown to myself, other students, and the instructor

(DR3) I was expected to formulate my own research questions or hypotheses to guide an investigation

(DR4) I was expected to develop new arguments based on data

(DR5) I was expected to explain how my work has resulted in new scientific knowledge

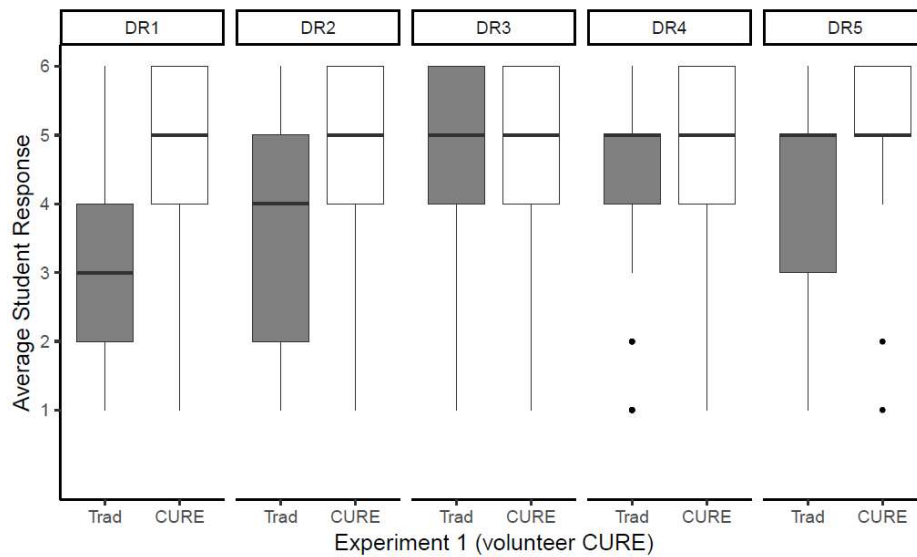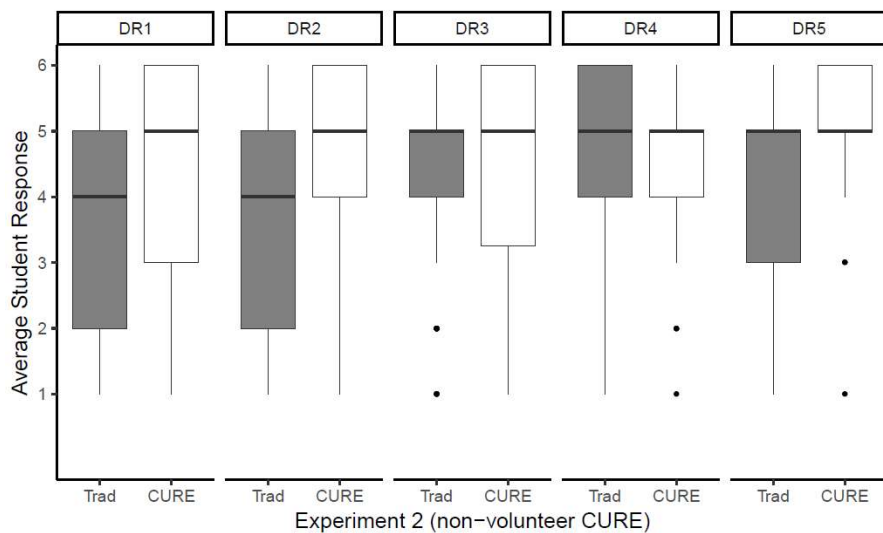

### Results from individual items on the cognitive ownership sub-scale of the POS

Horizontal bars indicate median and boxes represent the interquartile range for each item. The items included on this subscale are:

- (C1) My research will help to solve a problem in the world.
- (C2) My findings were important to the scientific community.
- (C3) I faced challenges that I managed to overcome in completing my research project.
- (C4) I was responsible for the outcomes of my research.
- (C5) The findings of my research project gave me a sense of personal achievement.
- (C6) I had a personal reason for choosing the research project I worked on.

- (C7) The research question I worked on was important to me.
- (C8) In conducting my research project, I actively sought advice and assistance.
- (C9) My research project was interesting.
- (C10) My research project was exciting.

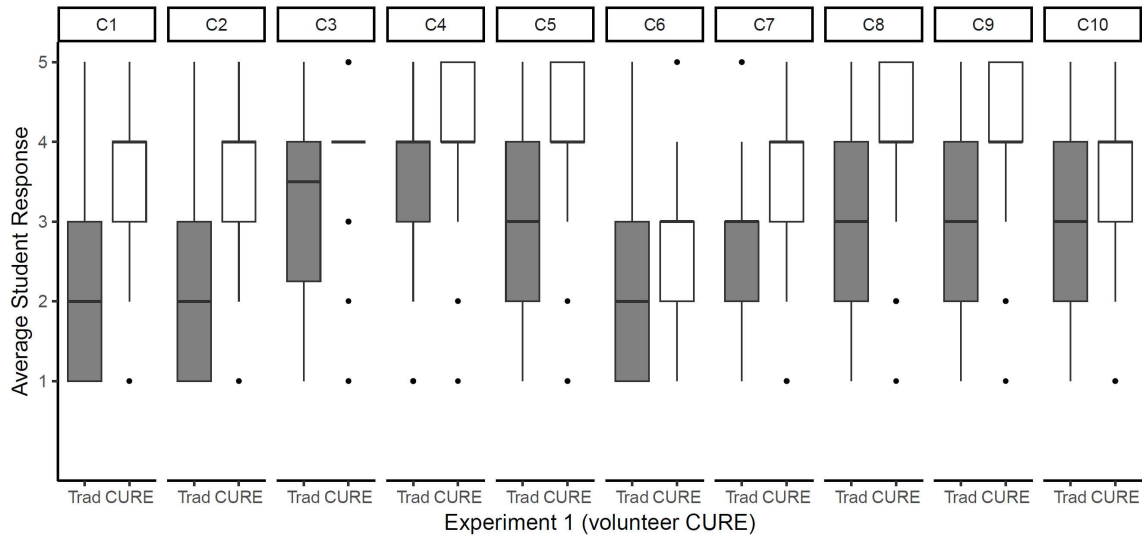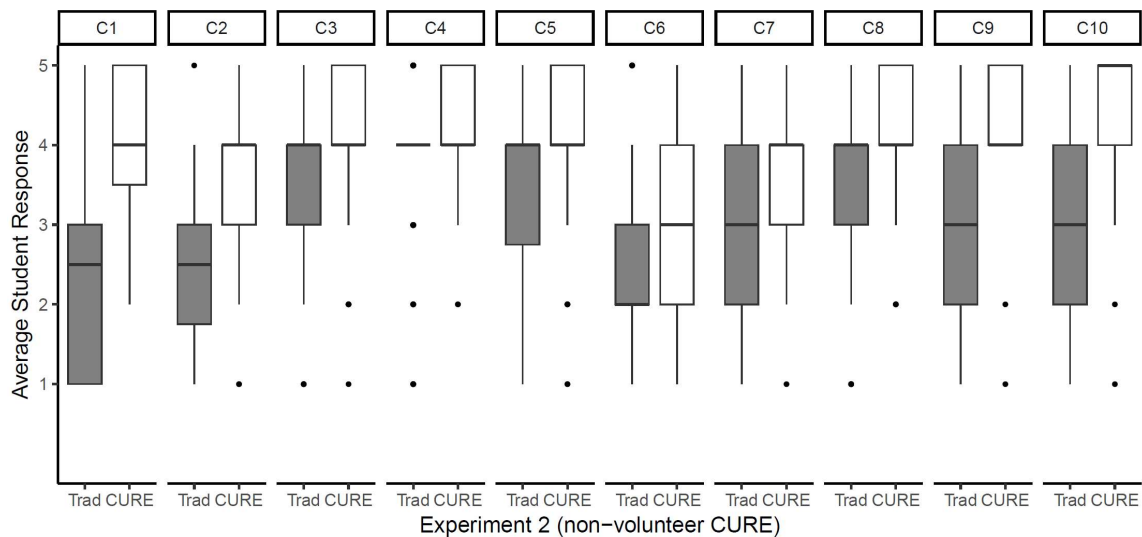

**Regression results, lecture exams using  $\ln(\text{odds of exam score})$  as outcome variable**

Call:  $\ln(\text{odds of fraction of exam points}) \sim \text{Lab Type} * \text{Subgroup} + \text{Sex} + \ln(5 - \text{Concurrent GPA})$

| Predictors | Experiment #1 (Volunteer) |    |          | Experiment #2 (Non-volunteer) |    |          |
|------------|---------------------------|----|----------|-------------------------------|----|----------|
|            | Ln(exam odds)             |    |          | Ln(exam odds)                 |    |          |
|            | Estimate<br><i>s</i>      | CI | <i>p</i> | Estimate<br><i>s</i>          | CI | <i>p</i> |

|                                          |               |               |                  |               |               |                  |
|------------------------------------------|---------------|---------------|------------------|---------------|---------------|------------------|
| Intercept                                | 1.82          | 1.67 – 1.97   | <b>&lt;0.001</b> | 1.76          | 1.57 – 1.94   | <b>&lt;0.001</b> |
| CURE (ref = Trad)                        | 0.23          | -0.02 – 0.48  | 0.066            | 0.04          | -0.16 – 0.24  | 0.708            |
| Pell only (ref = neither Pell nor BIPOC) | 0.04          | -0.15 – 0.24  | 0.654            | -0.08         | -0.30 – 0.14  | 0.470            |
| BIPOC only                               | 0.13          | -0.13 – 0.39  | 0.333            | -0.01         | -0.26 – 0.25  | 0.961            |
| Both Pell elig and BIPIC                 | -0.14         | -0.36 – 0.08  | 0.200            | -0.13         | -0.38 – 0.12  | 0.298            |
| Female sex (ref = male)                  | -0.13         | -0.27 – 0.02  | 0.085            | -0.20         | -0.35 – -0.05 | <b>0.010</b>     |
| ln(5-concurrent GPA)                     | -1.20         | -1.37 – -1.03 | <b>&lt;0.001</b> | -1.15         | -1.32 – -0.97 | <b>&lt;0.001</b> |
| CURE * Pell only                         | -0.15         | -0.58 – 0.27  | 0.478            | -0.12         | -0.48 – 0.24  | 0.524            |
| CURE * BIPOC only                        | -0.43         | -0.99 – 0.13  | 0.130            | -0.25         | -0.65 – 0.16  | 0.235            |
| CURE * Both Pell and BIPOC               | -0.42         | -0.85 – 0.00  | <b>0.051</b>     | -0.53         | -0.93 – -0.14 | <b>0.009</b>     |
| Observations                             | 432           |               |                  | 406           |               |                  |
| R <sup>2</sup> / R <sup>2</sup> adjusted | 0.377 / 0.364 |               |                  | 0.384 / 0.370 |               |                  |
